# Supplementary material for: Microbiota Reconstitution Does Not Cause Bone Loss in Germ-Free Mice
Source: PubMed Central journal article supplement (PMC5750390; doi:10.1128/mspheredirect.00545-17), 2018-01-03

GF

CONV-D

a)

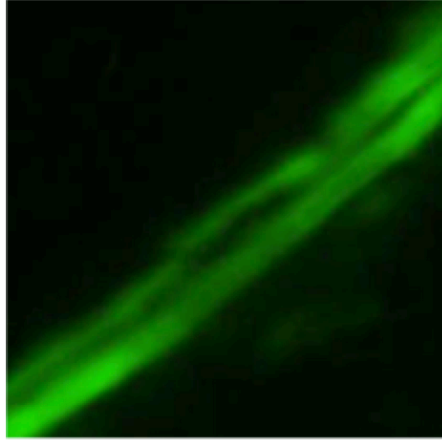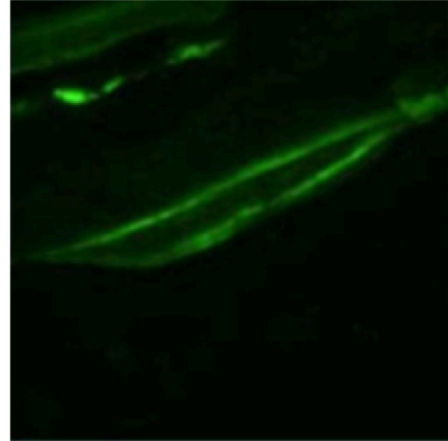

b)

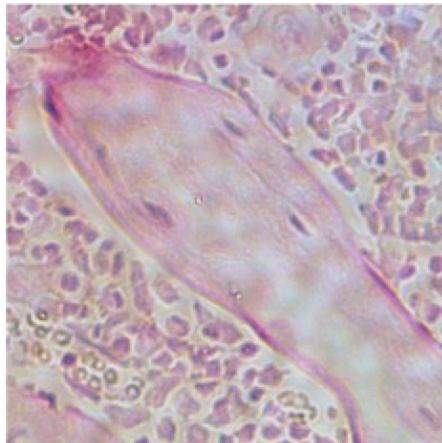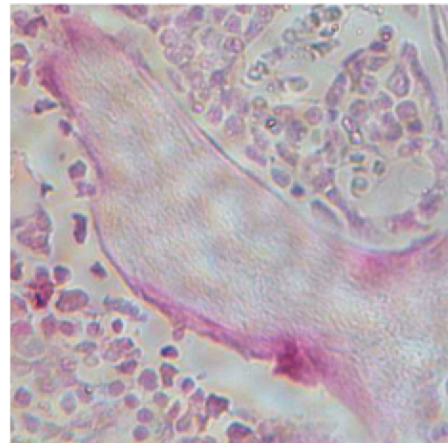

Supplement: sph001182436sf1.pdf [file sph001182436sf1.pdf]
