# Supplementary material for: Microbiota Reconstitution Does Not Cause Bone Loss in Germ-Free Mice
Source: PubMed Central journal article supplement (PMC5750390; doi:10.1128/mspheredirect.00545-17), 2018-01-03
Supplement: sph001182436st2.pdf [file sph001182436st2.pdf]

**Table S2**

| Condition | B (mm) | b (mm) | D (mm) | d (mm) | t (mm) | C (mm) | c (mm) | I           |
|-----------|--------|--------|--------|--------|--------|--------|--------|-------------|
| GF        | 1.16   | 0.8    | 0.88   | 0.56   | 0.165  | 1.06   | 0.53   | 0.031850721 |
| GF        | 1.2    | 0.71   | 0.84   | 0.52   | 0.17   | 1.01   | 0.505  | 0.029959243 |
| GF        | 1.12   | 0.69   | 0.88   | 0.49   | 0.172  | 1.05   | 0.525  | 0.033421471 |
| GF        | 1.16   | 0.77   | 0.84   | 0.51   | 0.156  | 1.11   | 0.555  | 0.028684373 |
| GF        | 1.2    | 0.79   | 0.84   | 0.43   | 0.168  | 1.18   | 0.59   | 0.031773279 |
| GF        | 1.2    | 0.81   | 0.84   | 0.47   | 0.16   | 1.01   | 0.505  | 0.03073026  |
| GF        | 1.12   | 0.71   | 0.88   | 0.5    | 0.169  | 1.13   | 0.565  | 0.033050433 |
| GF        | 1.16   | 0.72   | 0.84   | 0.55   | 0.169  | 1.04   | 0.52   | 0.027819585 |
| GF        | 1.2    | 0.75   | 0.84   | 0.57   | 0.173  | 1.14   | 0.57   | 0.028045152 |
| GF        | 1.12   | 0.76   | 0.88   | 0.45   | 0.168  | 0.99   | 0.495  | 0.034005688 |
| CONV-D    | 1.16   | 0.7    | 0.84   | 0.6    | 0.168  | 1.12   | 0.56   | 0.026280495 |
| CONV-D    | 1.12   | 0.67   | 0.84   | 0.53   | 0.166  | 1.09   | 0.545  | 0.027639964 |
| CONV-D    | 1.08   | 0.69   | 0.92   | 0.51   | 0.165  | 1.15   | 0.575  | 0.036723239 |
| CONV-D    | 1.2    | 0.78   | 0.8    | 0.48   | 0.166  | 1.33   | 0.665  | 0.025878774 |
| CONV-D    | 1.08   | 0.73   | 0.84   | 0.49   | 0.176  | 0.92   | 0.46   | 0.027157591 |
| CONV-D    | 1.08   | 0.75   | 0.8    | 0.44   | 0.149  | 0.93   | 0.465  | 0.023964528 |
| CONV-D    | 1.08   | 0.69   | 0.88   | 0.56   | 0.165  | 1.09   | 0.545  | 0.030125921 |
| CONV-D    | 1.12   | 0.66   | 0.84   | 0.55   | 0.154  | 1.13   | 0.565  | 0.027147028 |
| CONV-D    | 1.04   | 0.73   | 0.92   | 0.49   | 0.166  | 0.92   | 0.46   | 0.035473636 |
